# Supplementary material for: Photocatalytic dye degradation using BiVO4–paint composite coatings
Source: Royal Society of Chemistry journal article supplement (doi:10.1039/d2ma00316c), 2022-01-01
Supplement: d2ma00316c1.pdf [file d2ma00316c1.pdf]

### Supplementary data

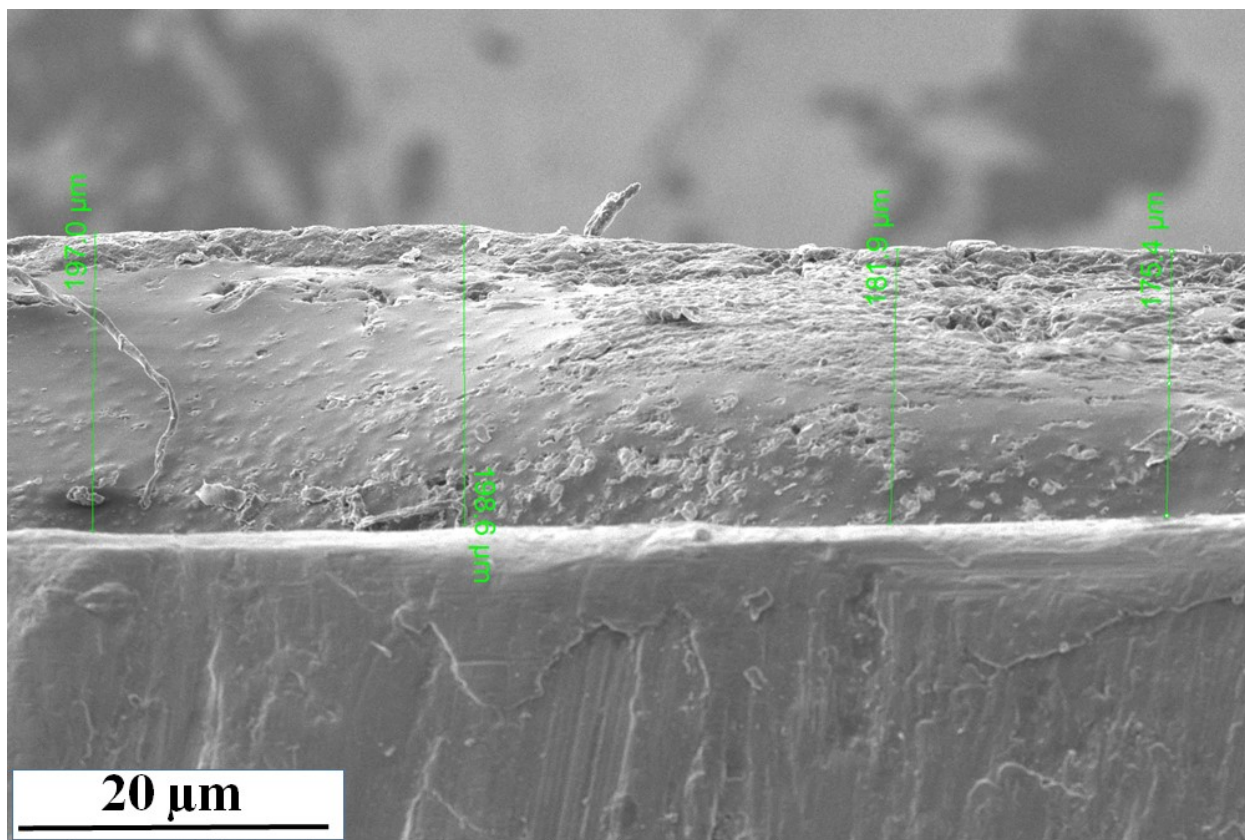

**Fig. S1. Coating width for the 40BiV-paint sample**

Fig. S1 presents the scanning electron microscopy image of 40BiV-paint sample. The micrograph shows the thickness of the catalyst coating on the aluminium alloy substrate. The average thickness of the coating is  $\sim 188 \mu\text{m}$ .
